# Supplementary material for: A projection specific logic to sampling visual inputs in mouse superior colliculus
Source: eLife journal article supplement (doi:10.7554/elife.50697), 2019-11-20

Figure 2 – Figure Supplement 1. All 599 cells (445 LP; 263 Pbg) in their corresponding cluster

A Cluster 1 | 1wt | sOFF $\alpha$

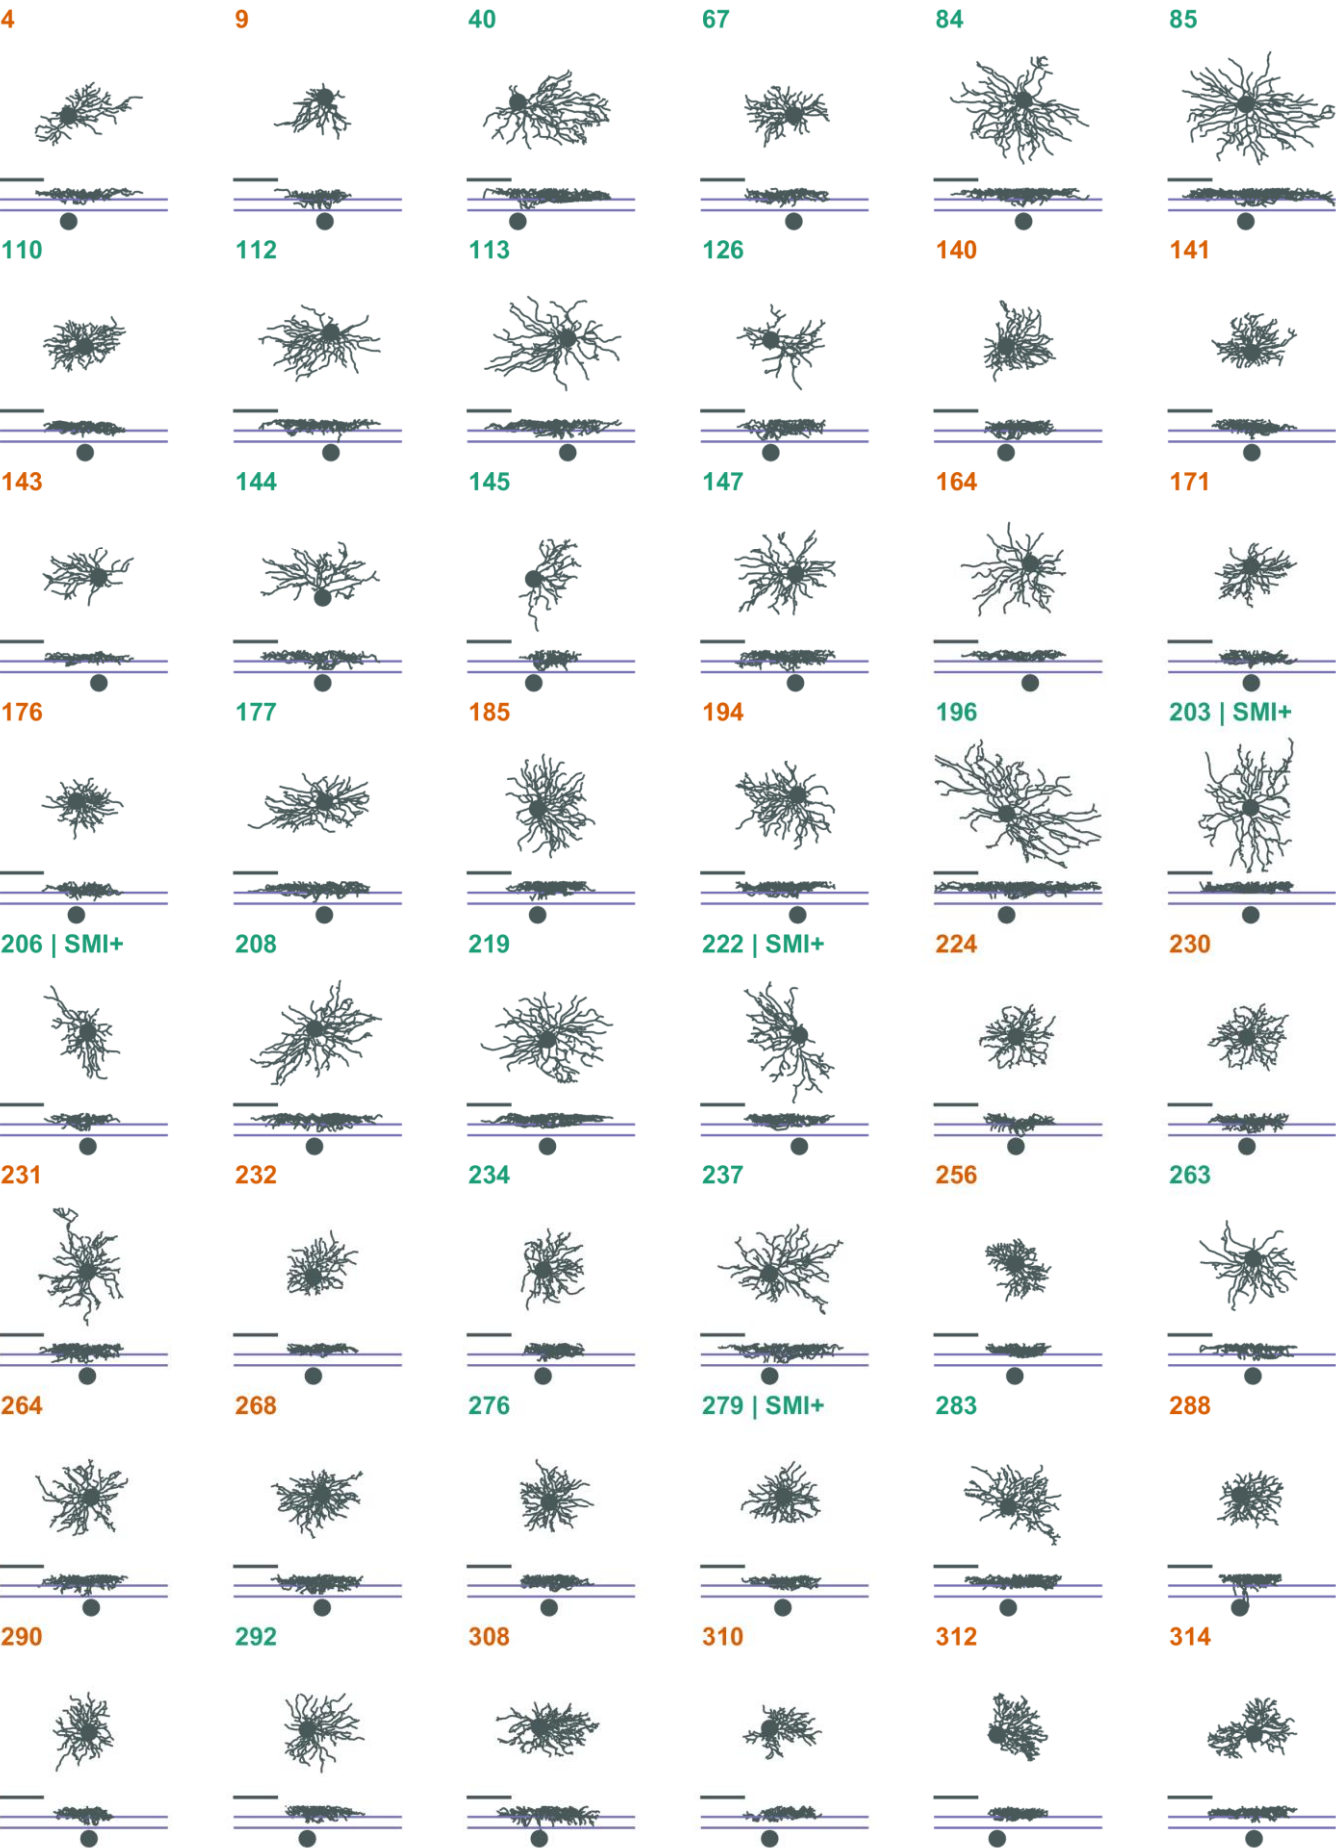

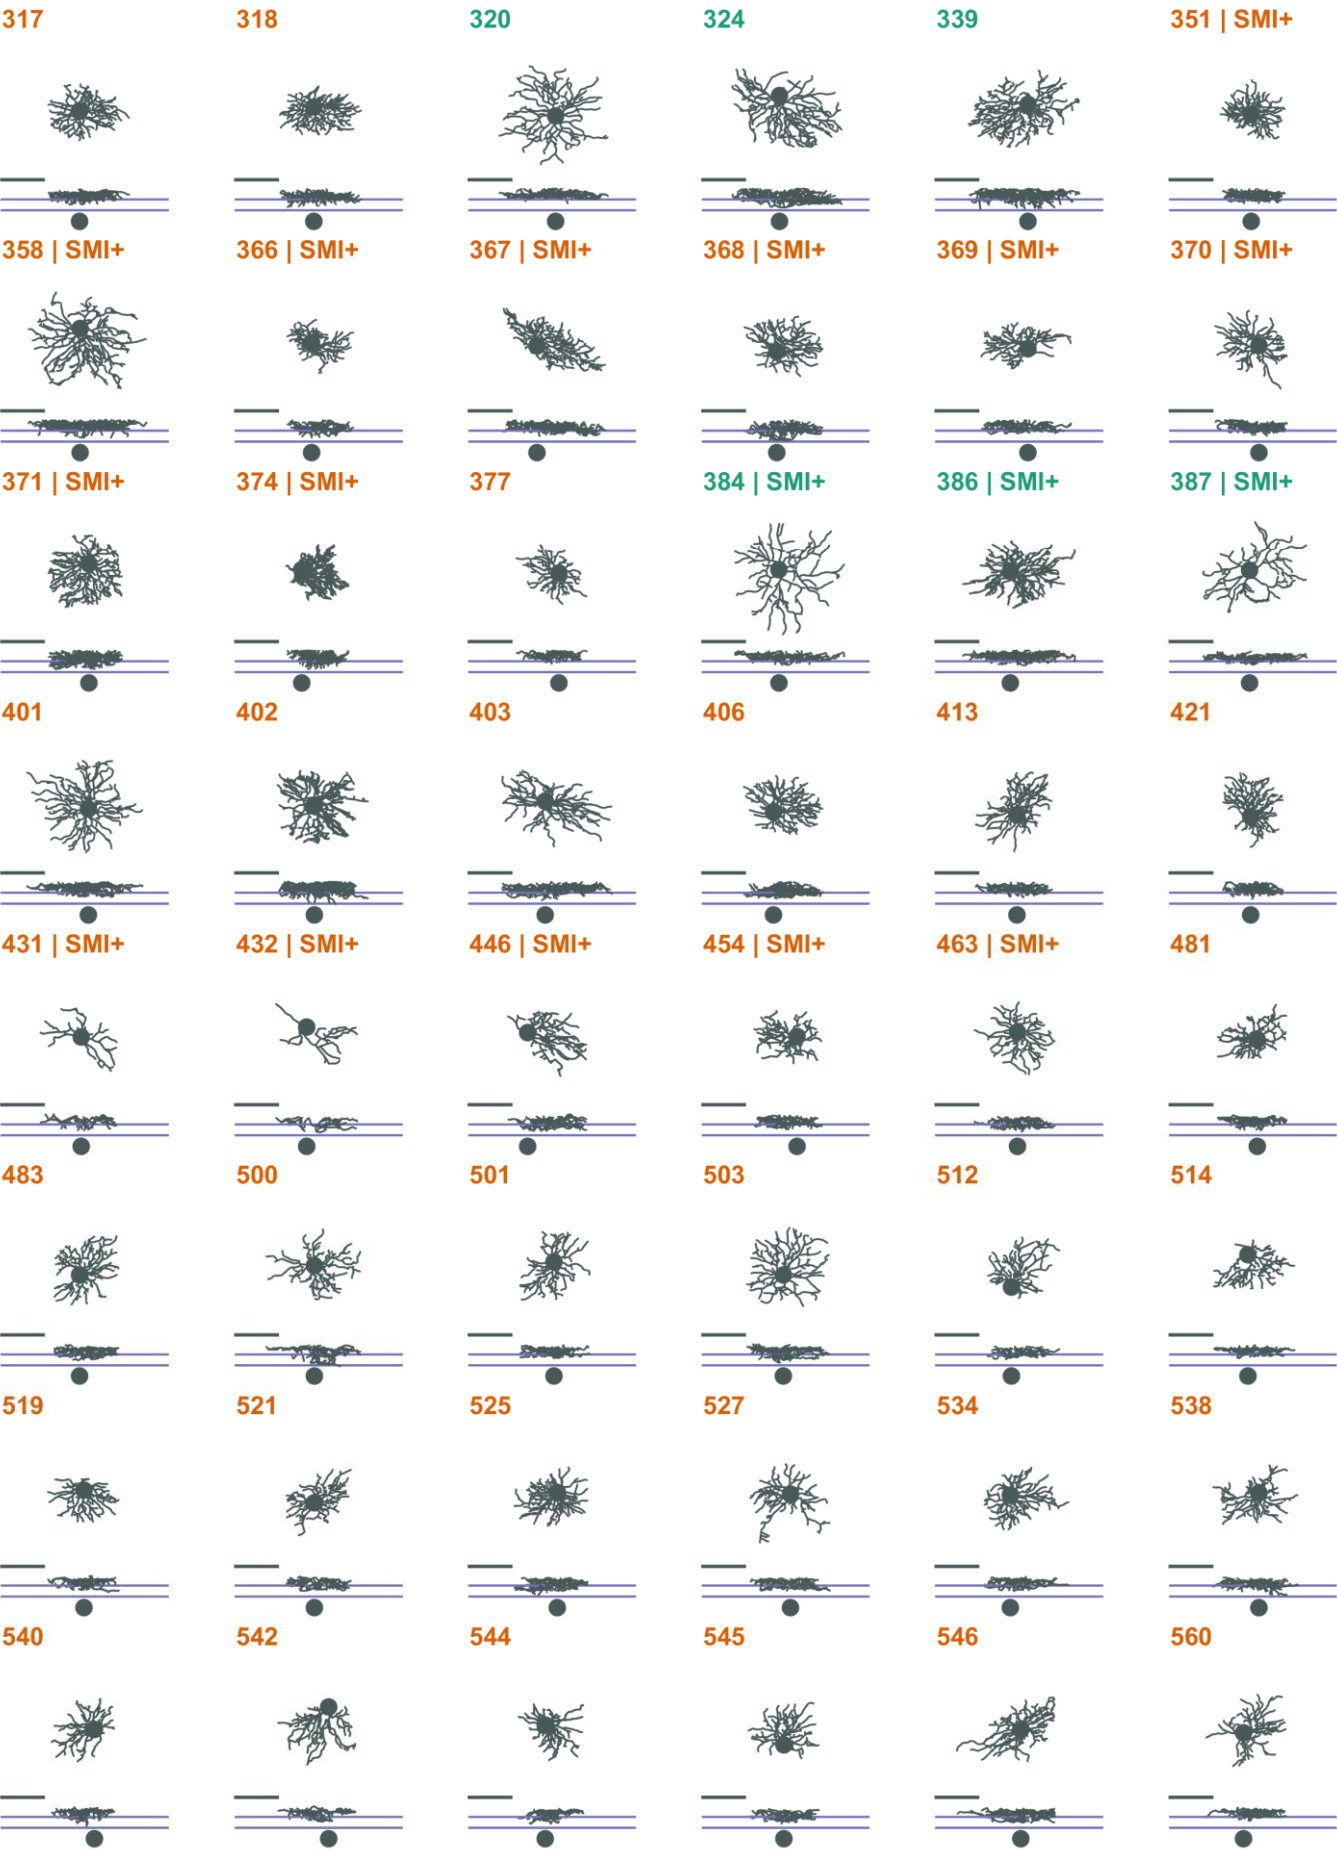

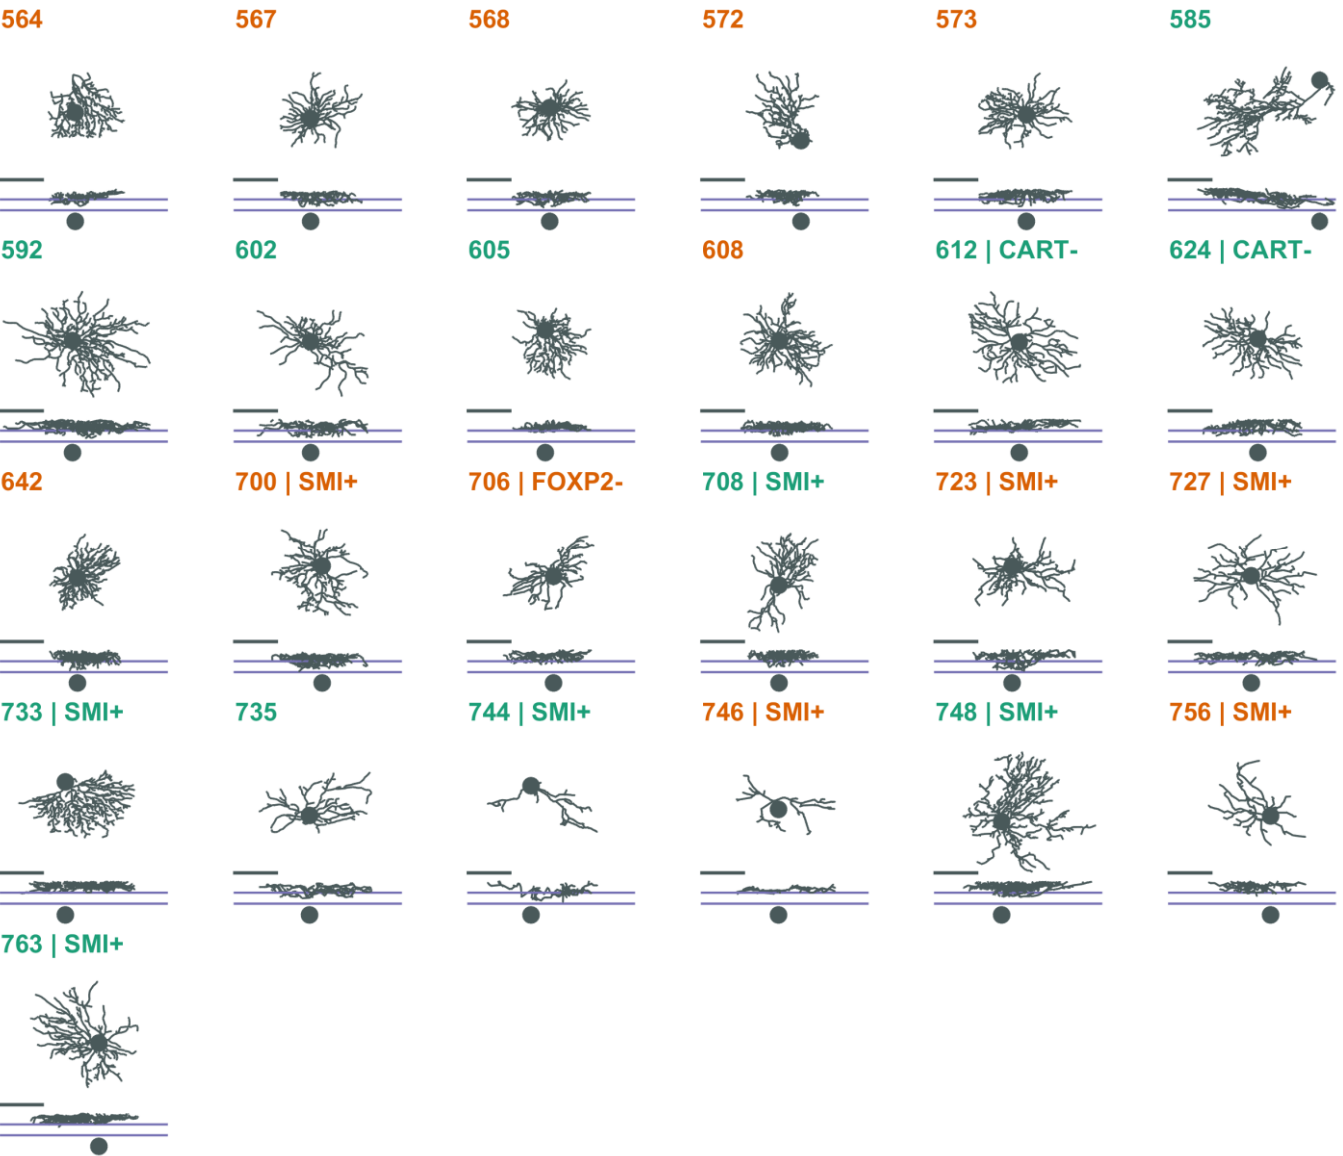

B Cluster 2 | 2an | F-mini<sup>OFF</sup>

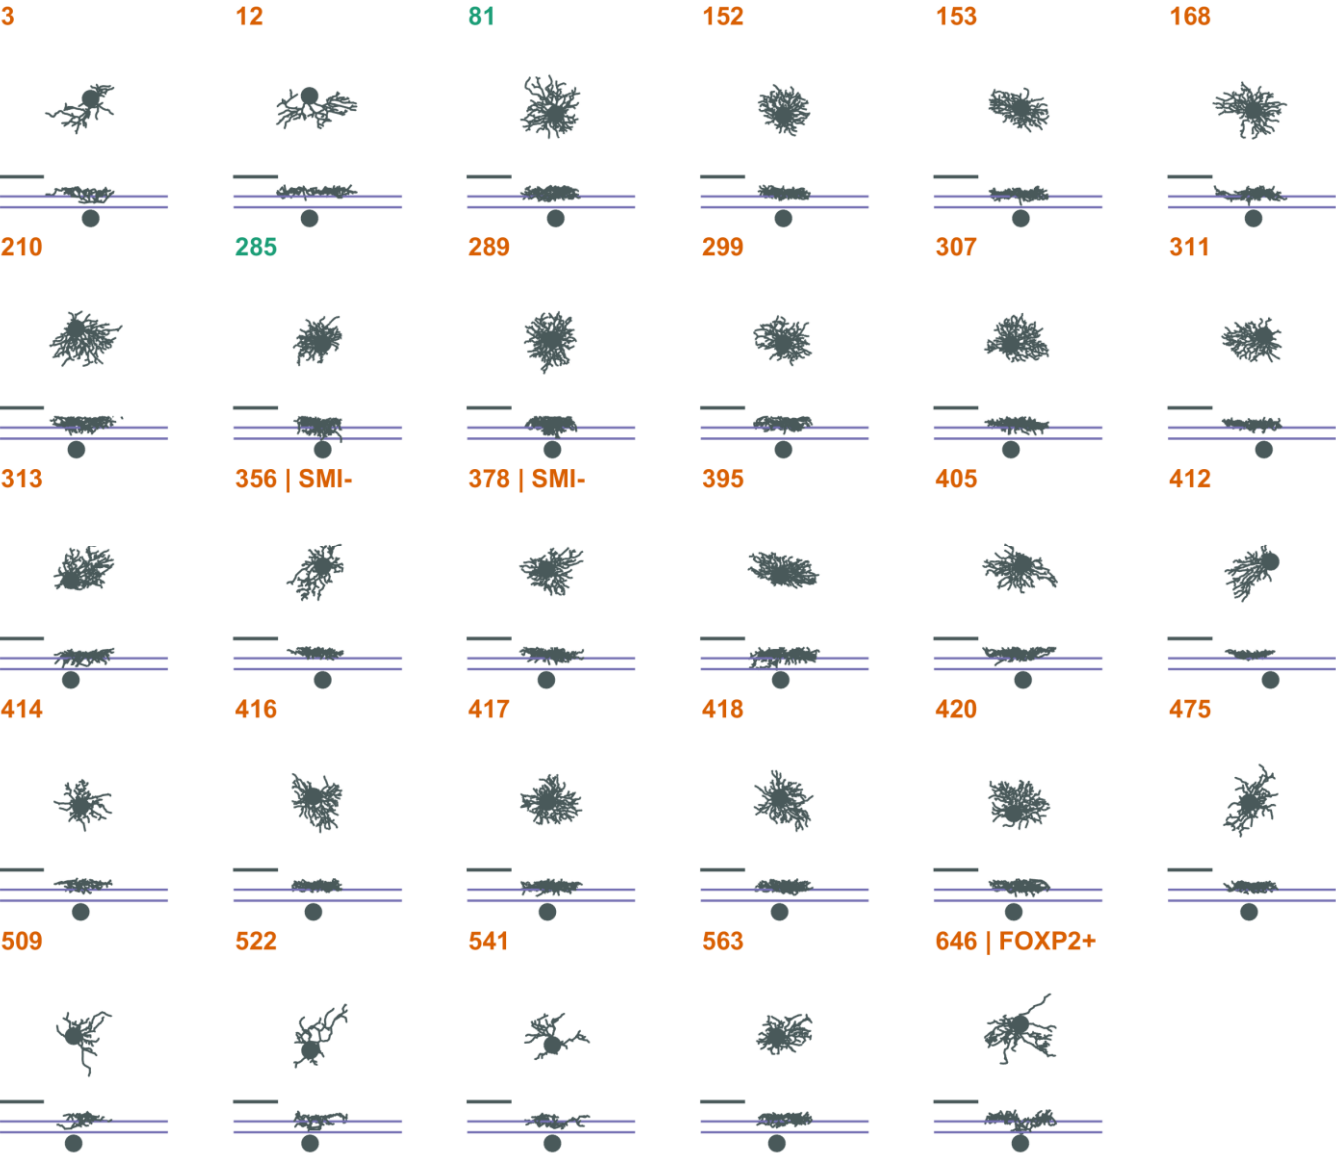



C Cluster 3 | 27

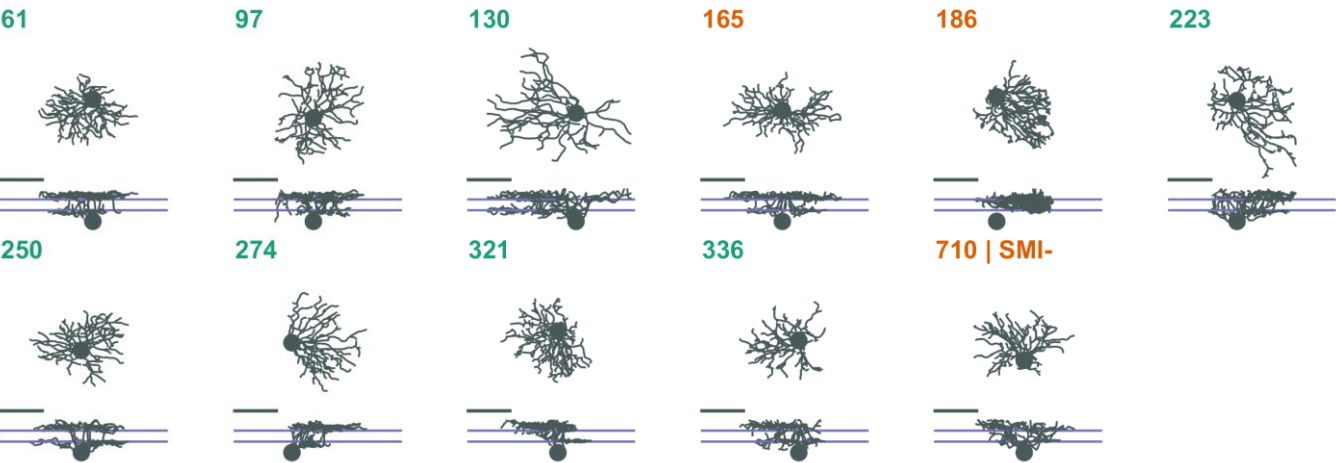

D Cluster 4 | 37c | ON-OFF DS

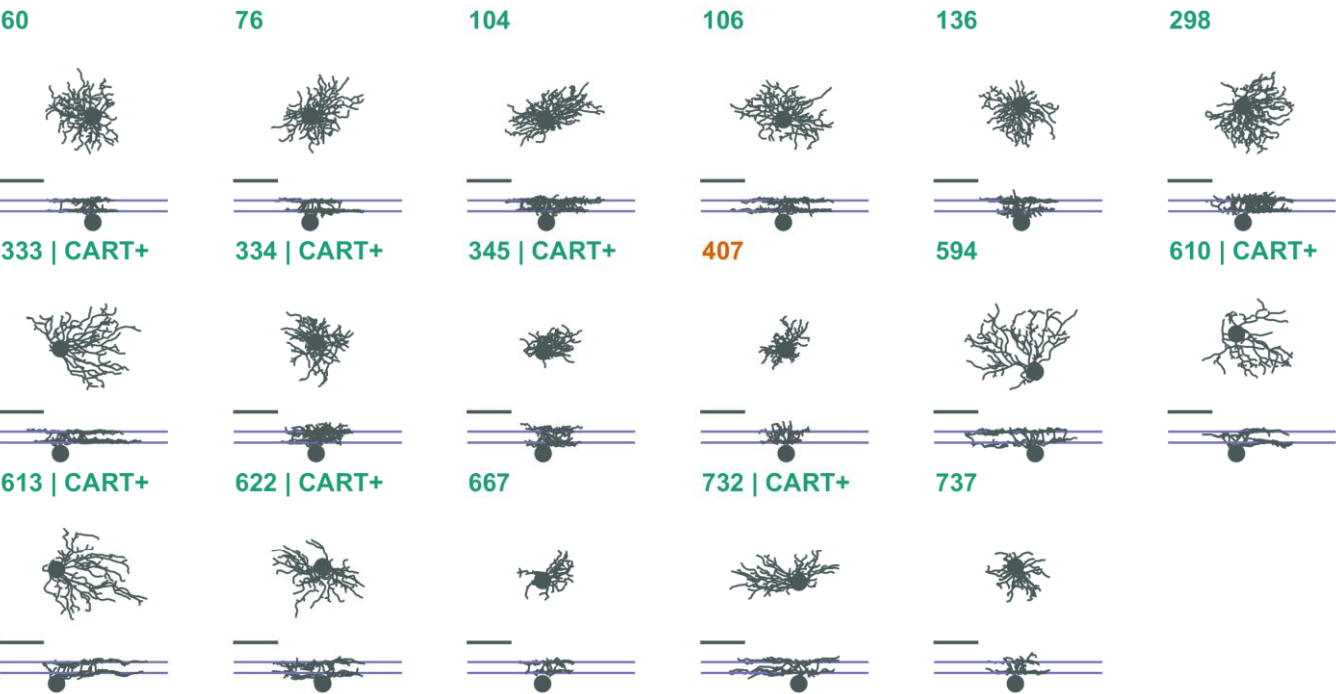

E Cluster 5 | 4i/4on | mini tOFF $\alpha$

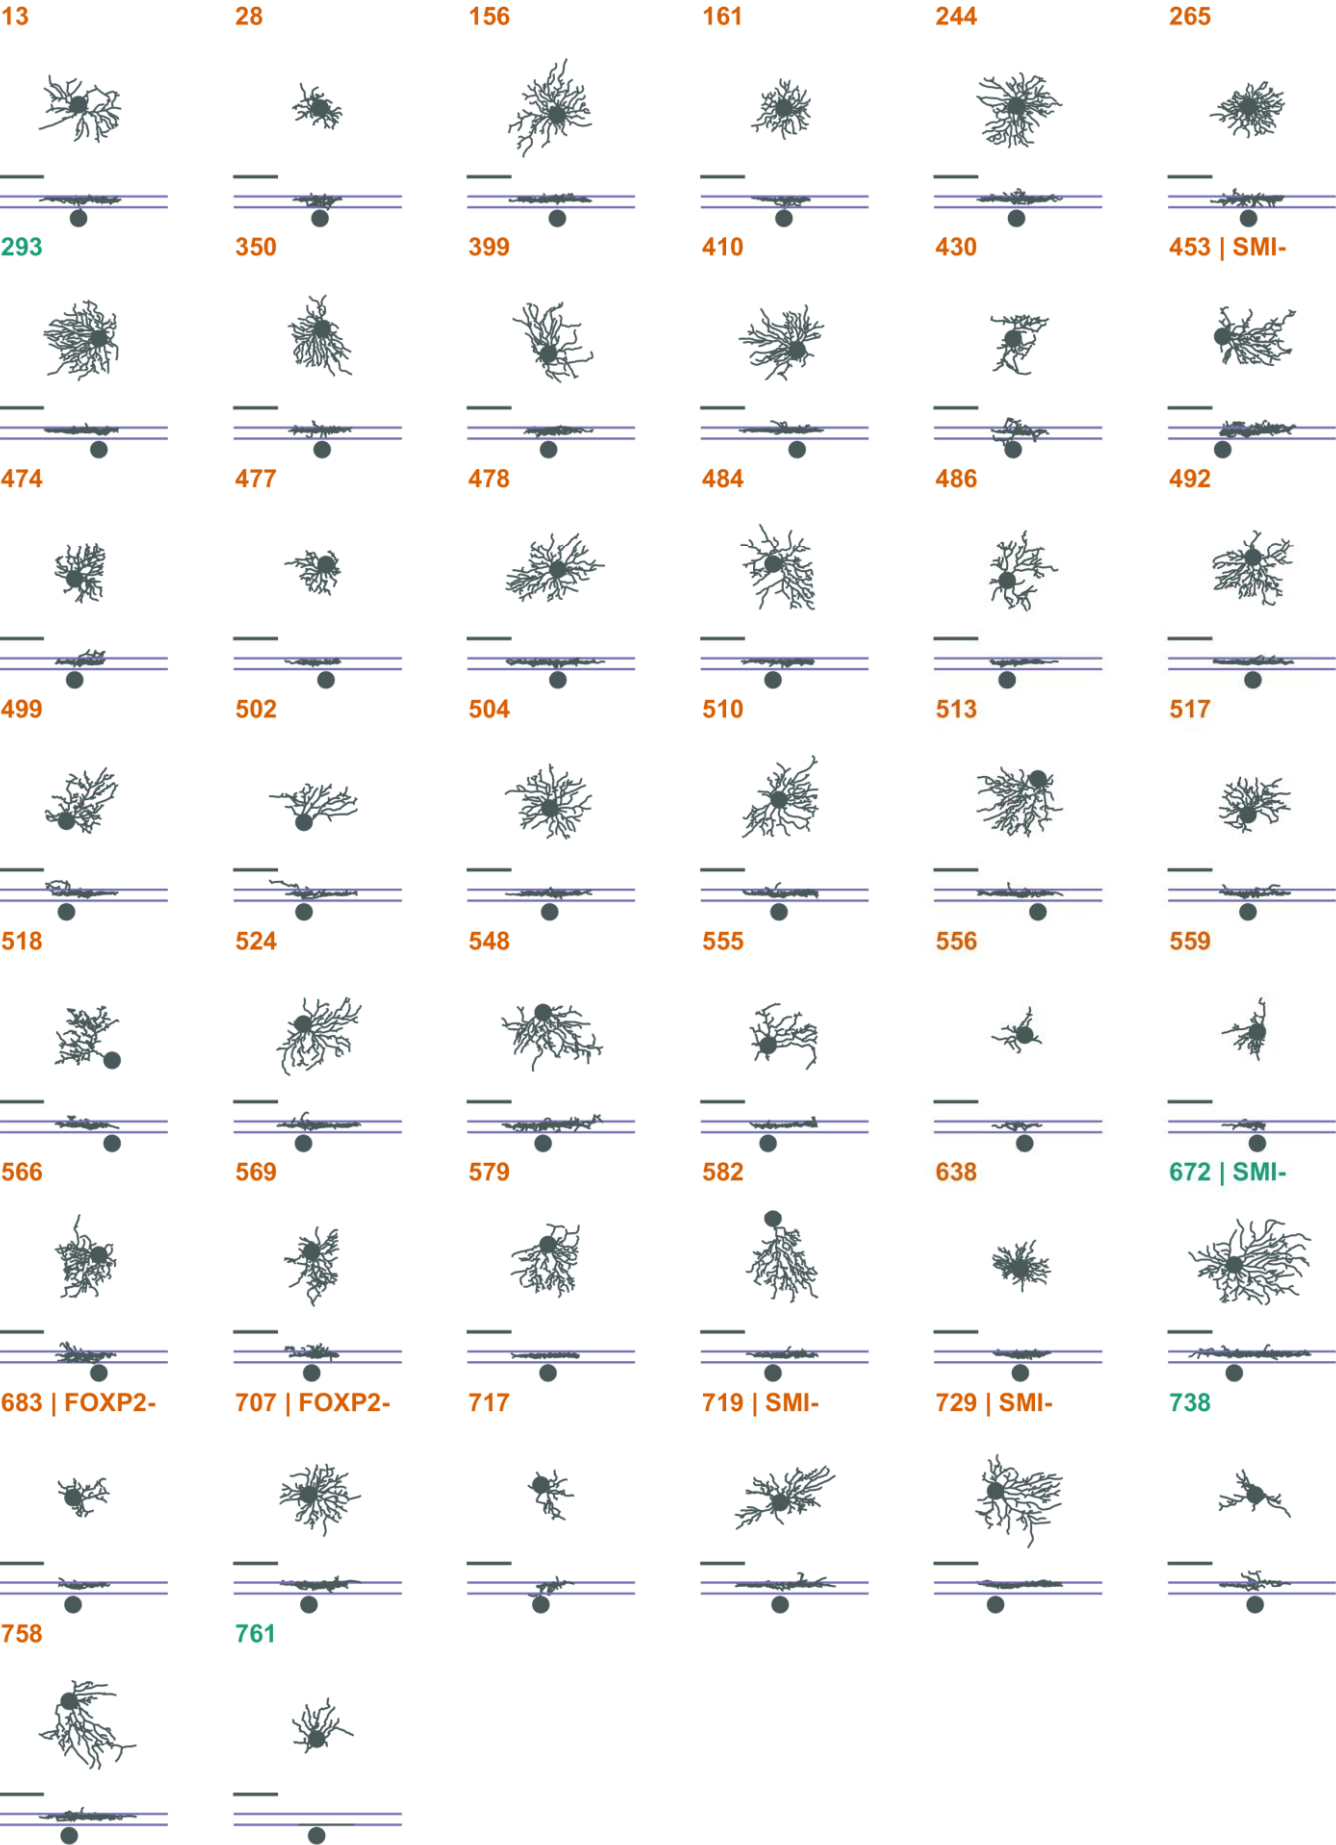

F Cluster 6 | 4ow | tOFF $\alpha$

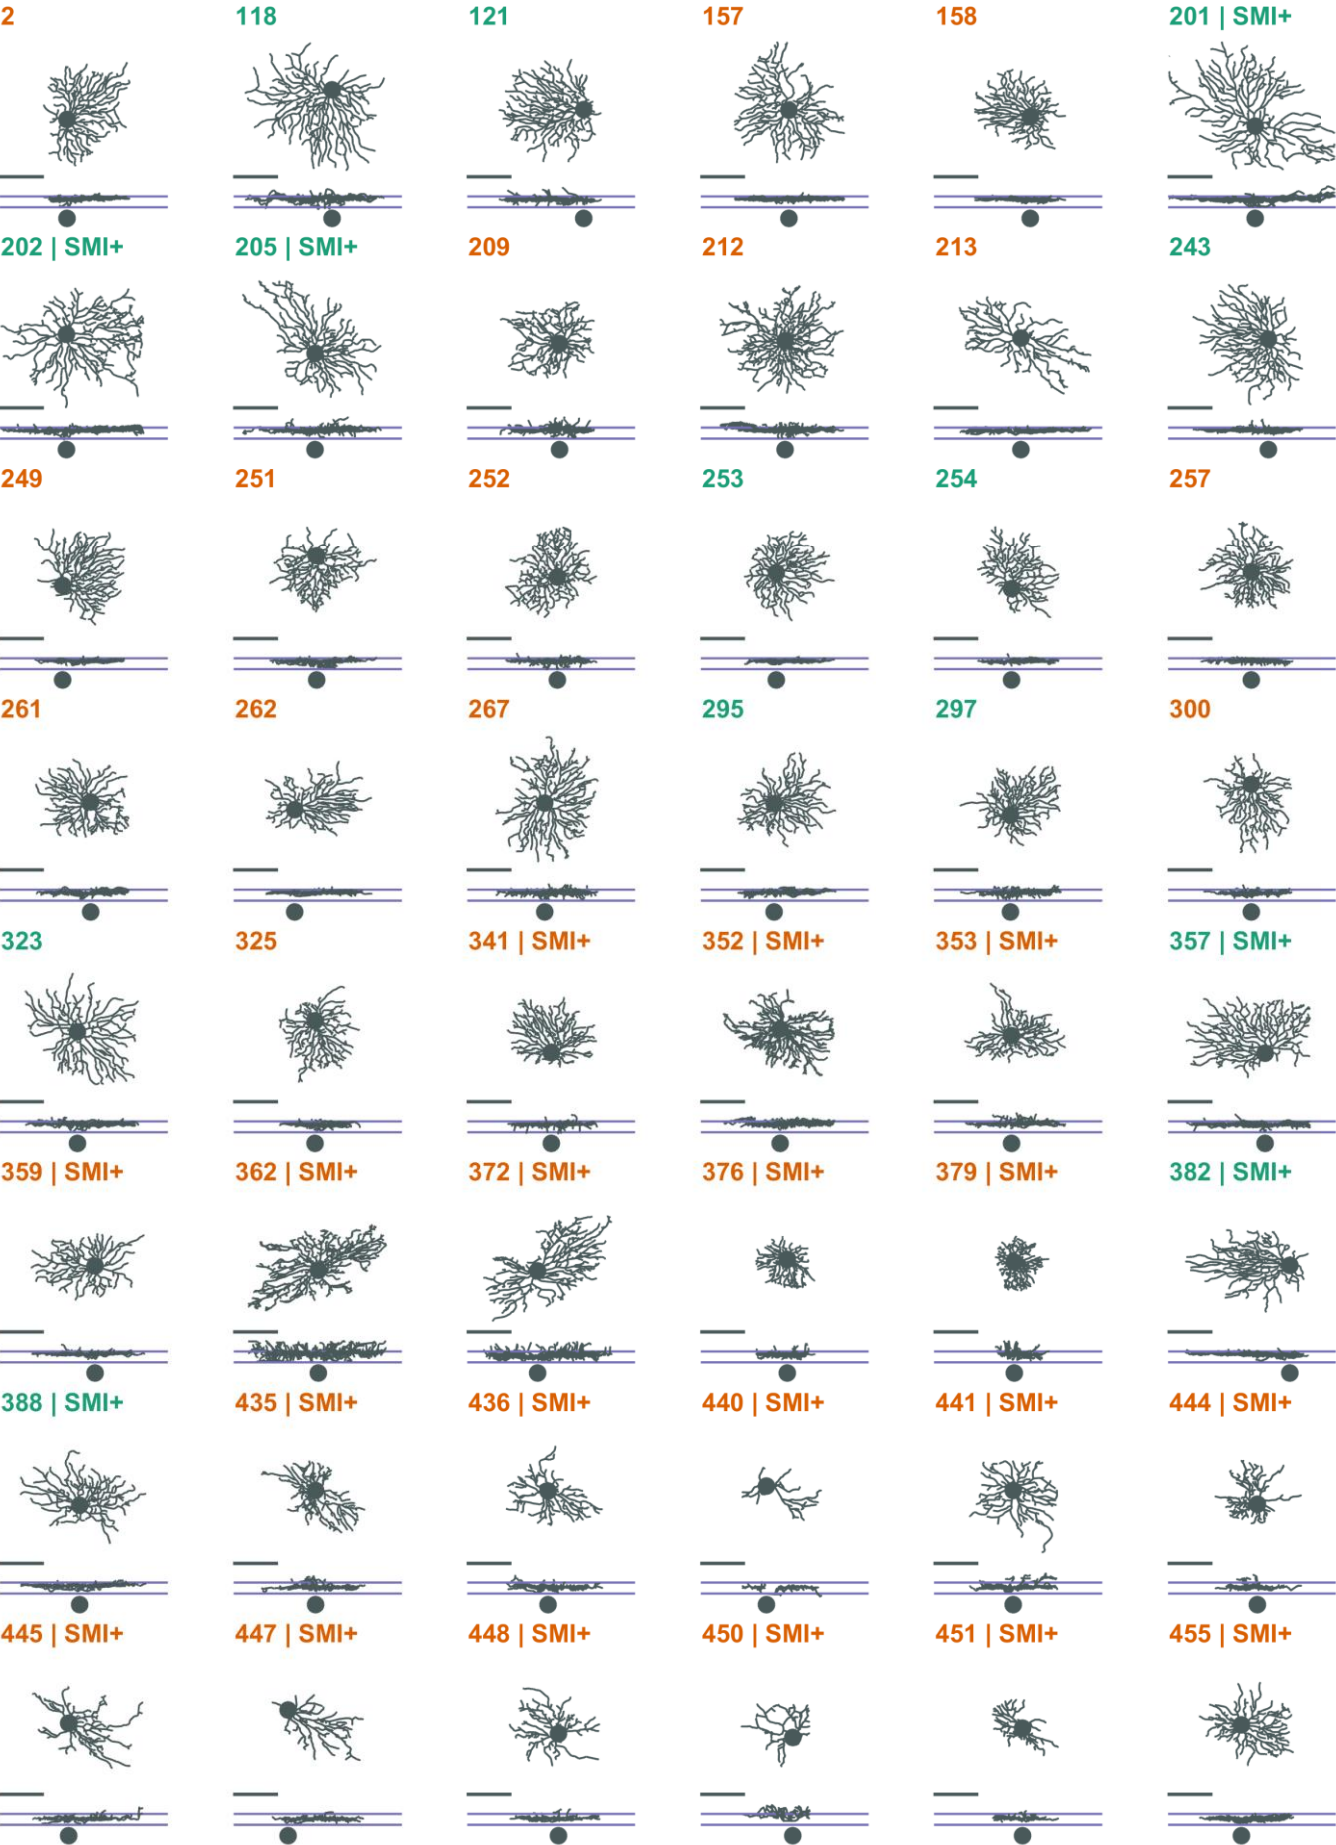

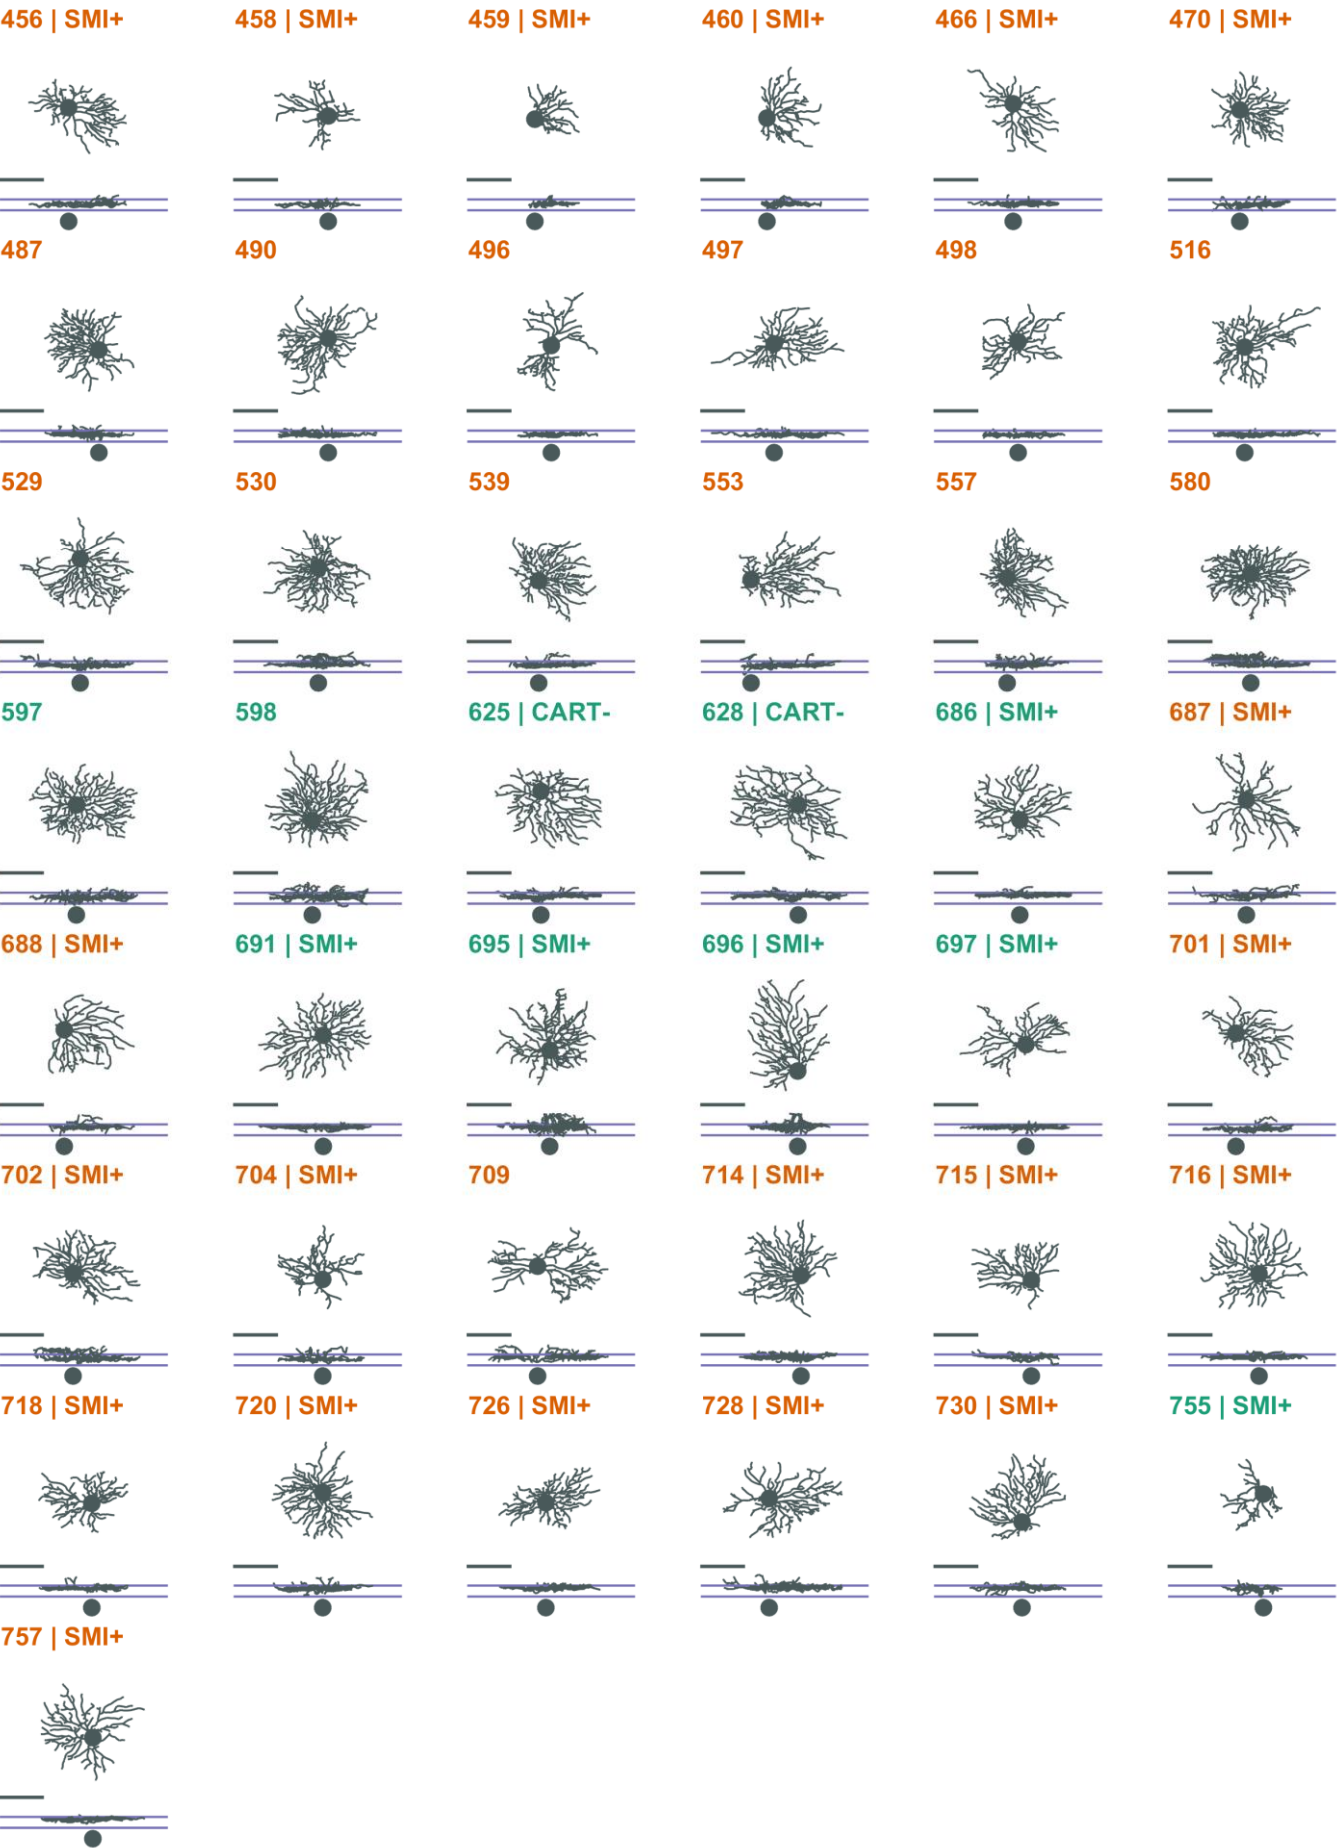

G Cluster 7 | 5to

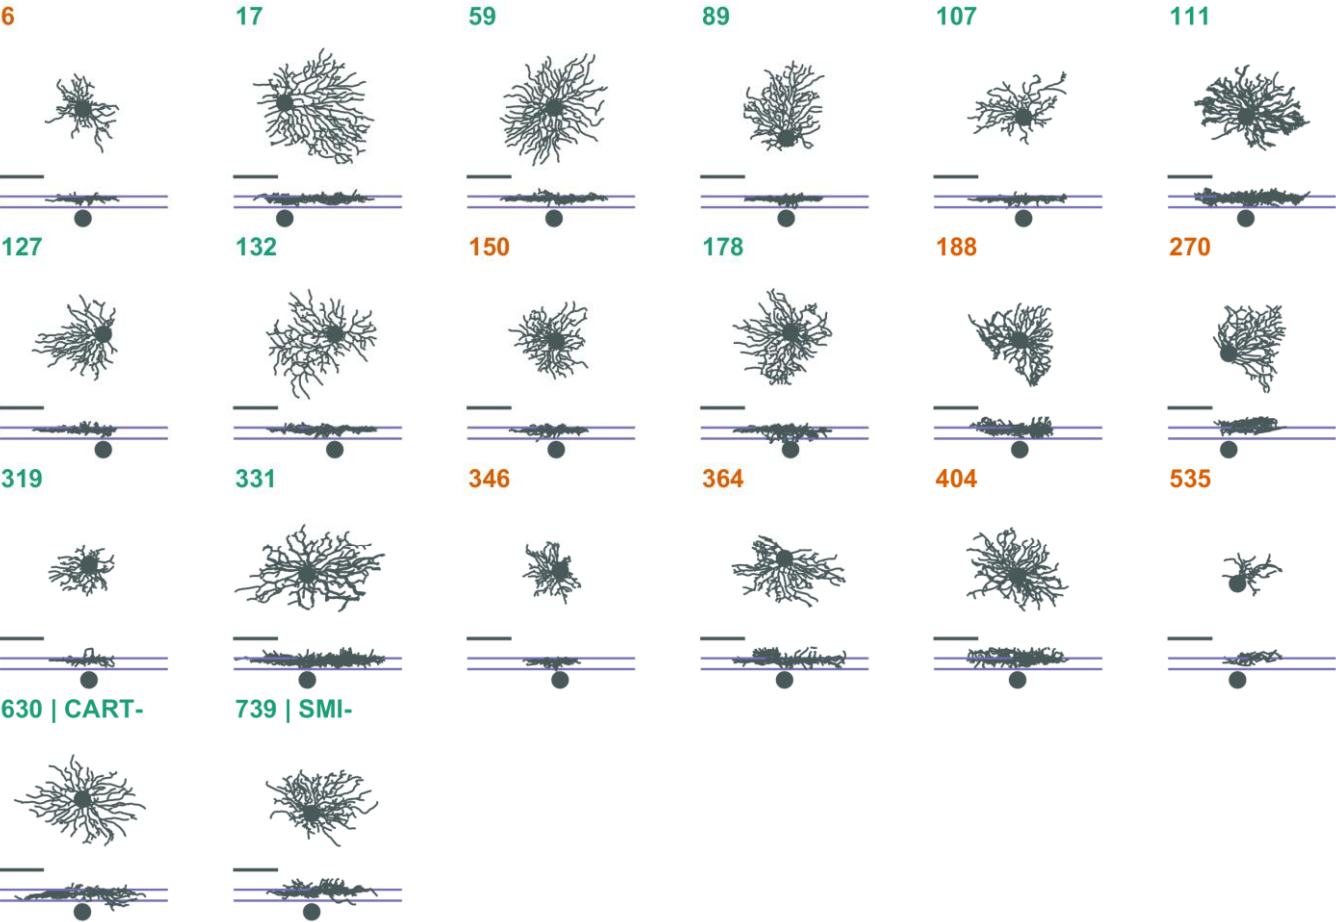



H Cluster 8 | 5si | HD1 or HD2

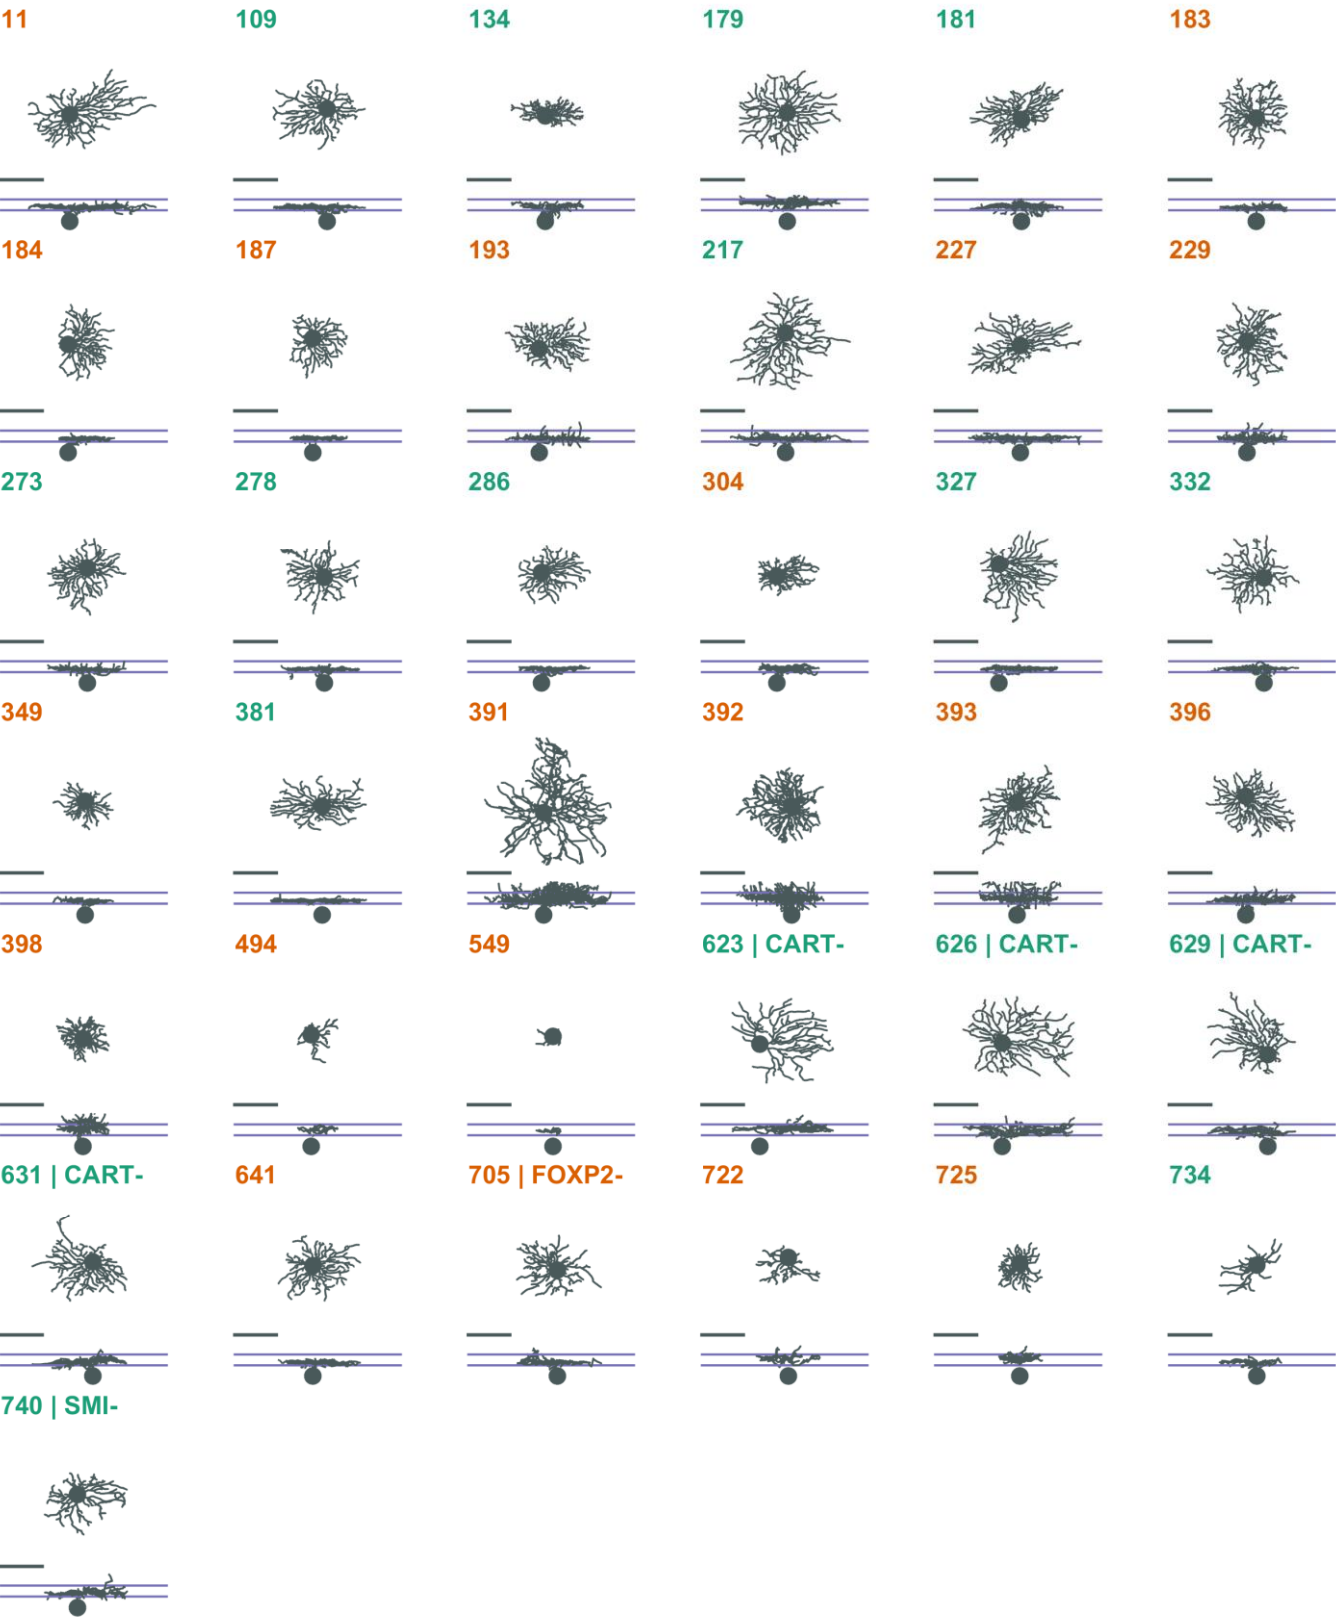



I Cluster 9 | 63 | F-mini<sup>ON</sup>

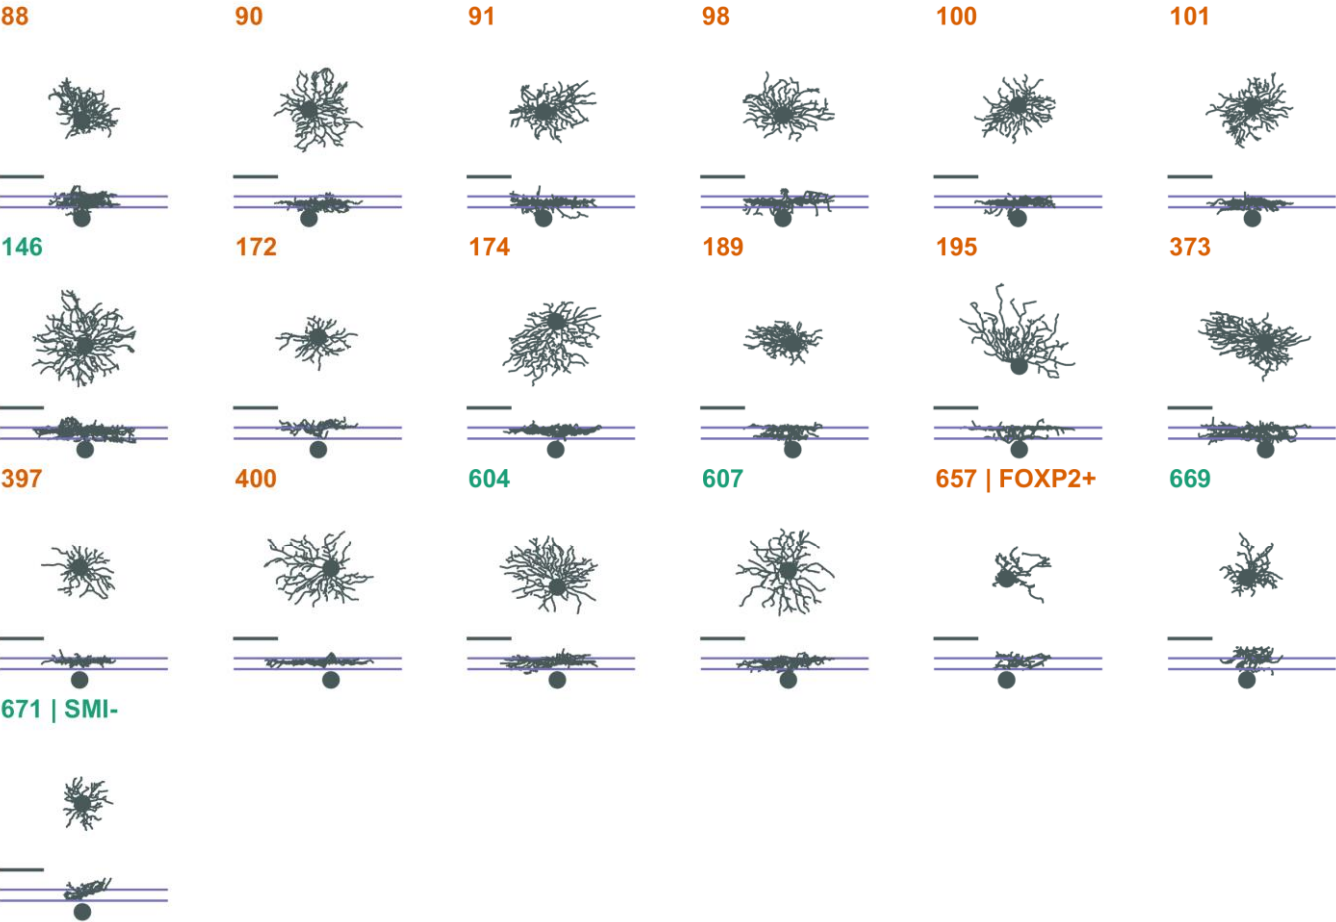

J Cluster 10 | 6sn

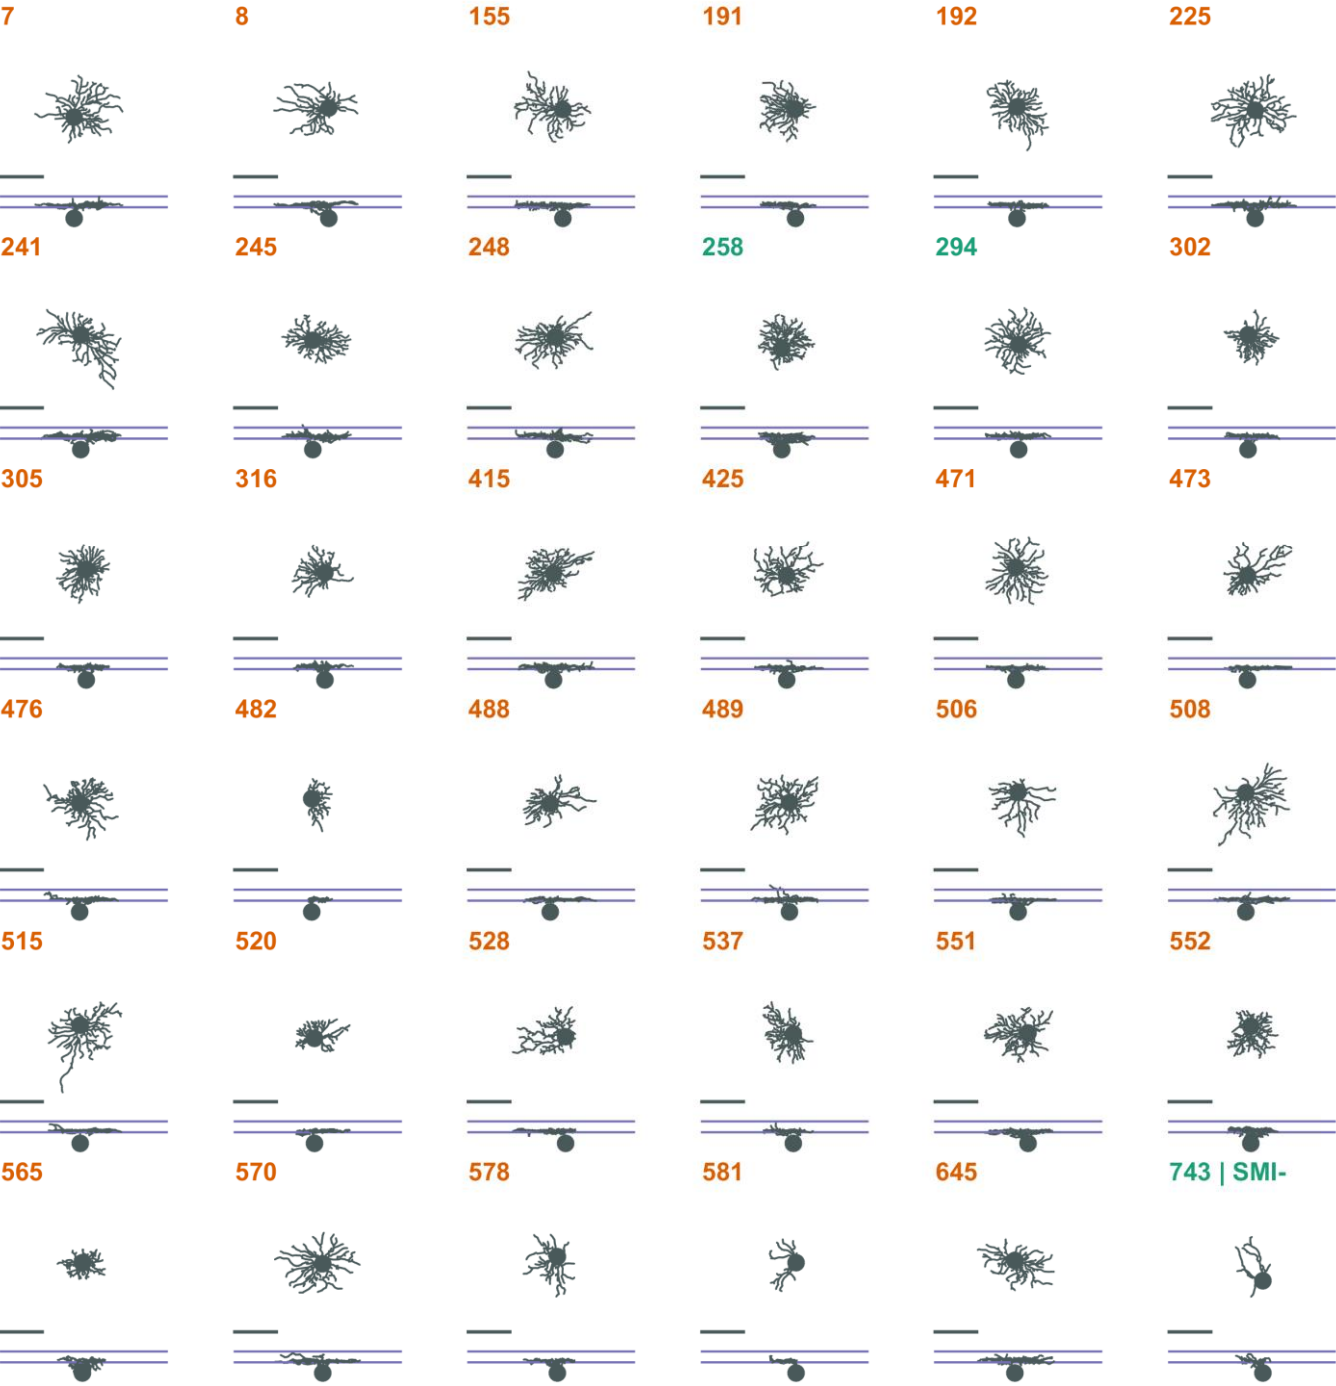

K Cluster 11 | 6sw | tON $\alpha$

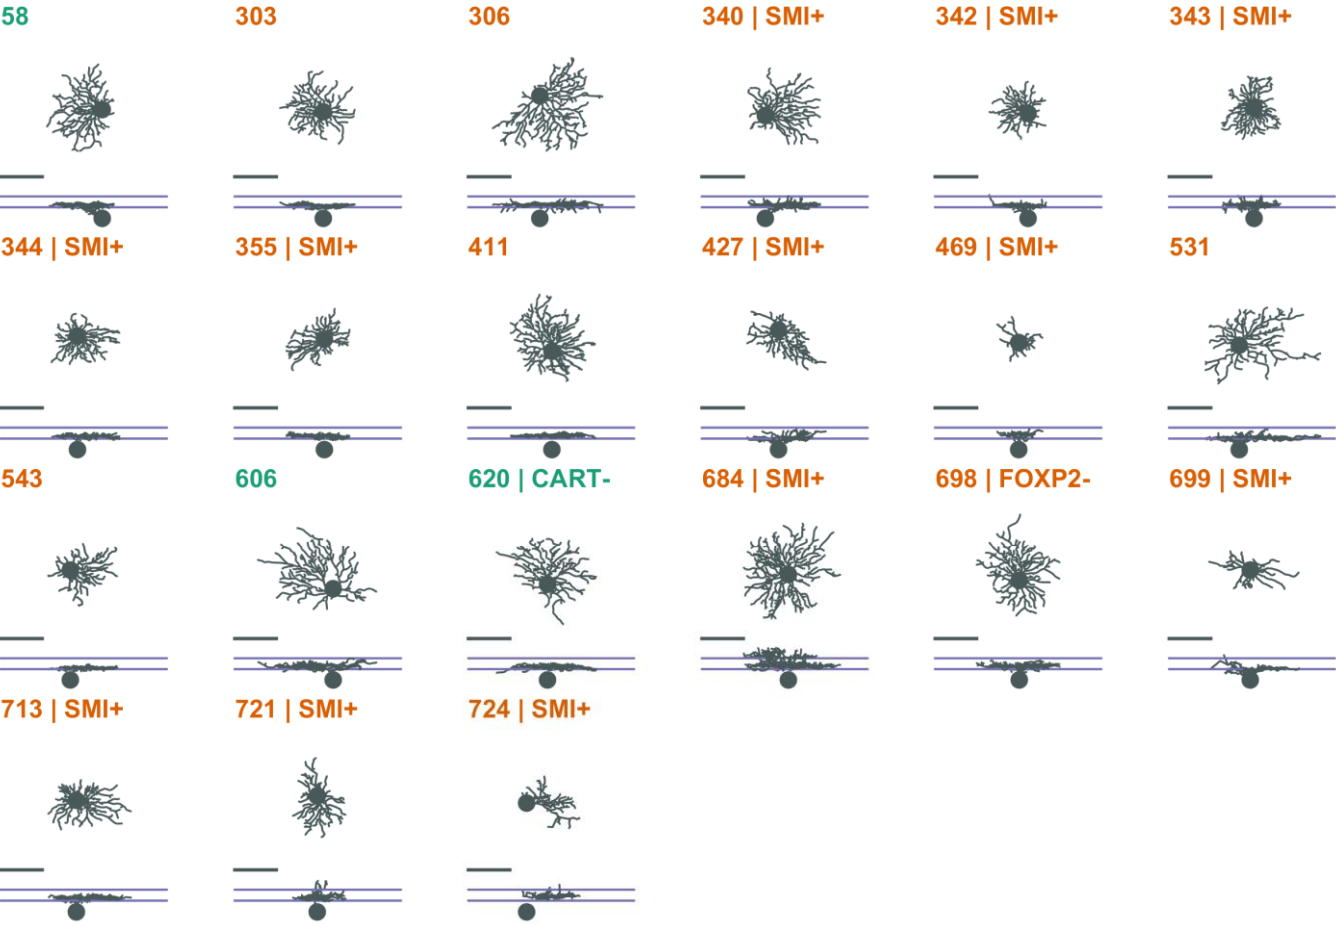

L Cluster 12 | 6t | F-midi<sup>ON</sup>

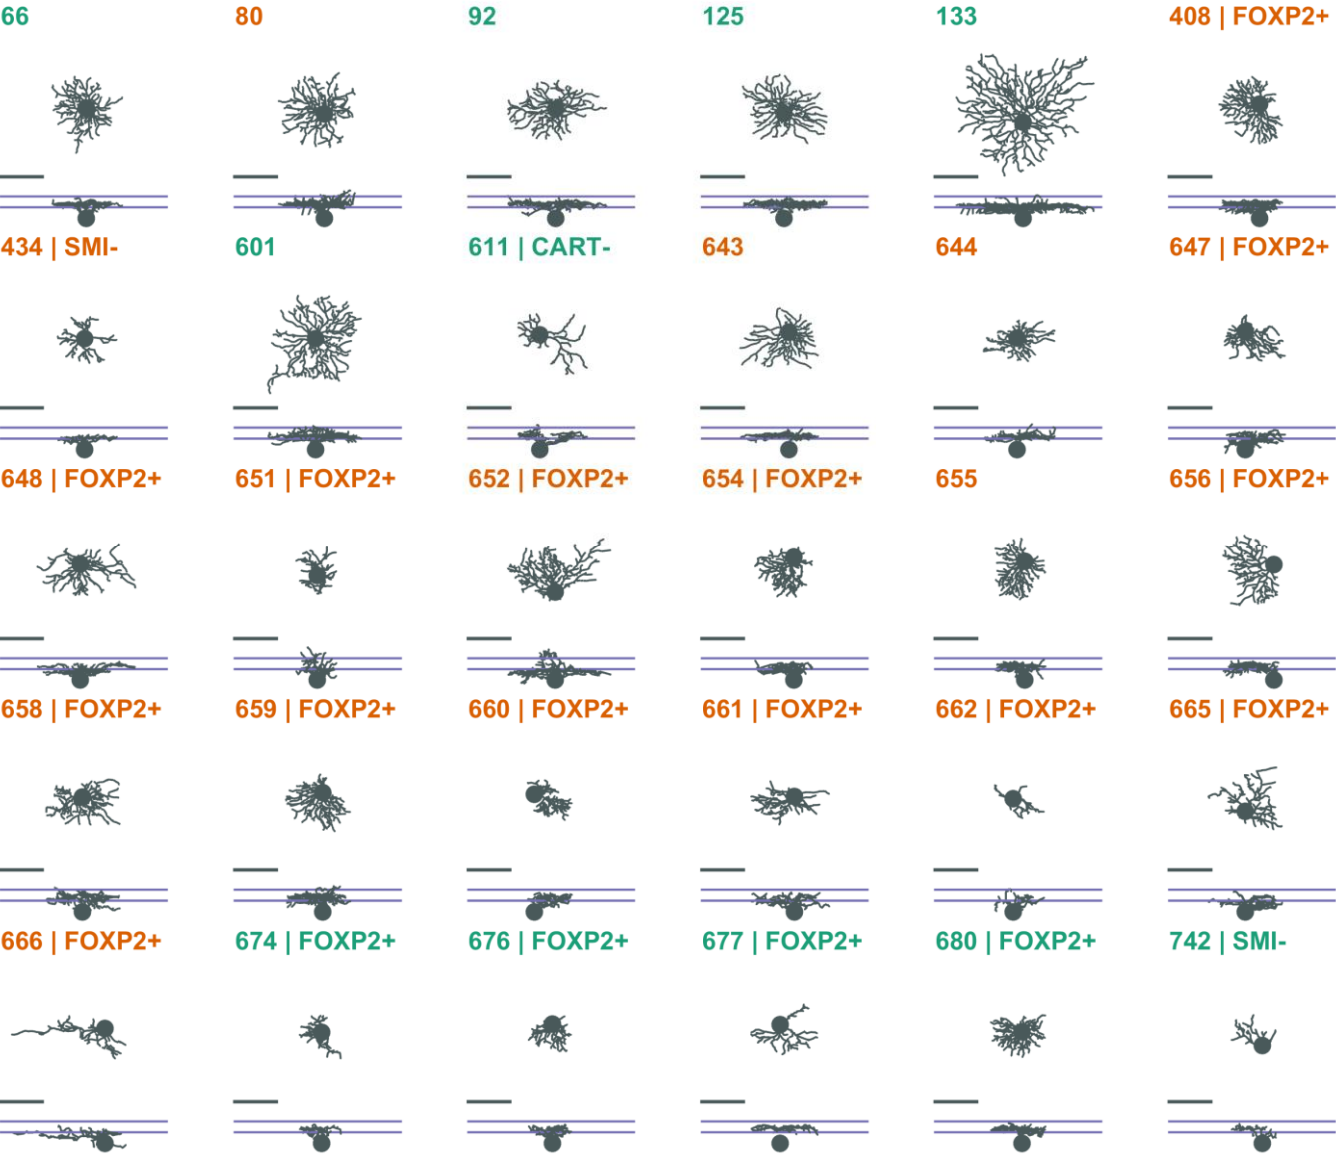

M Cluster 13 | 8w | sONα

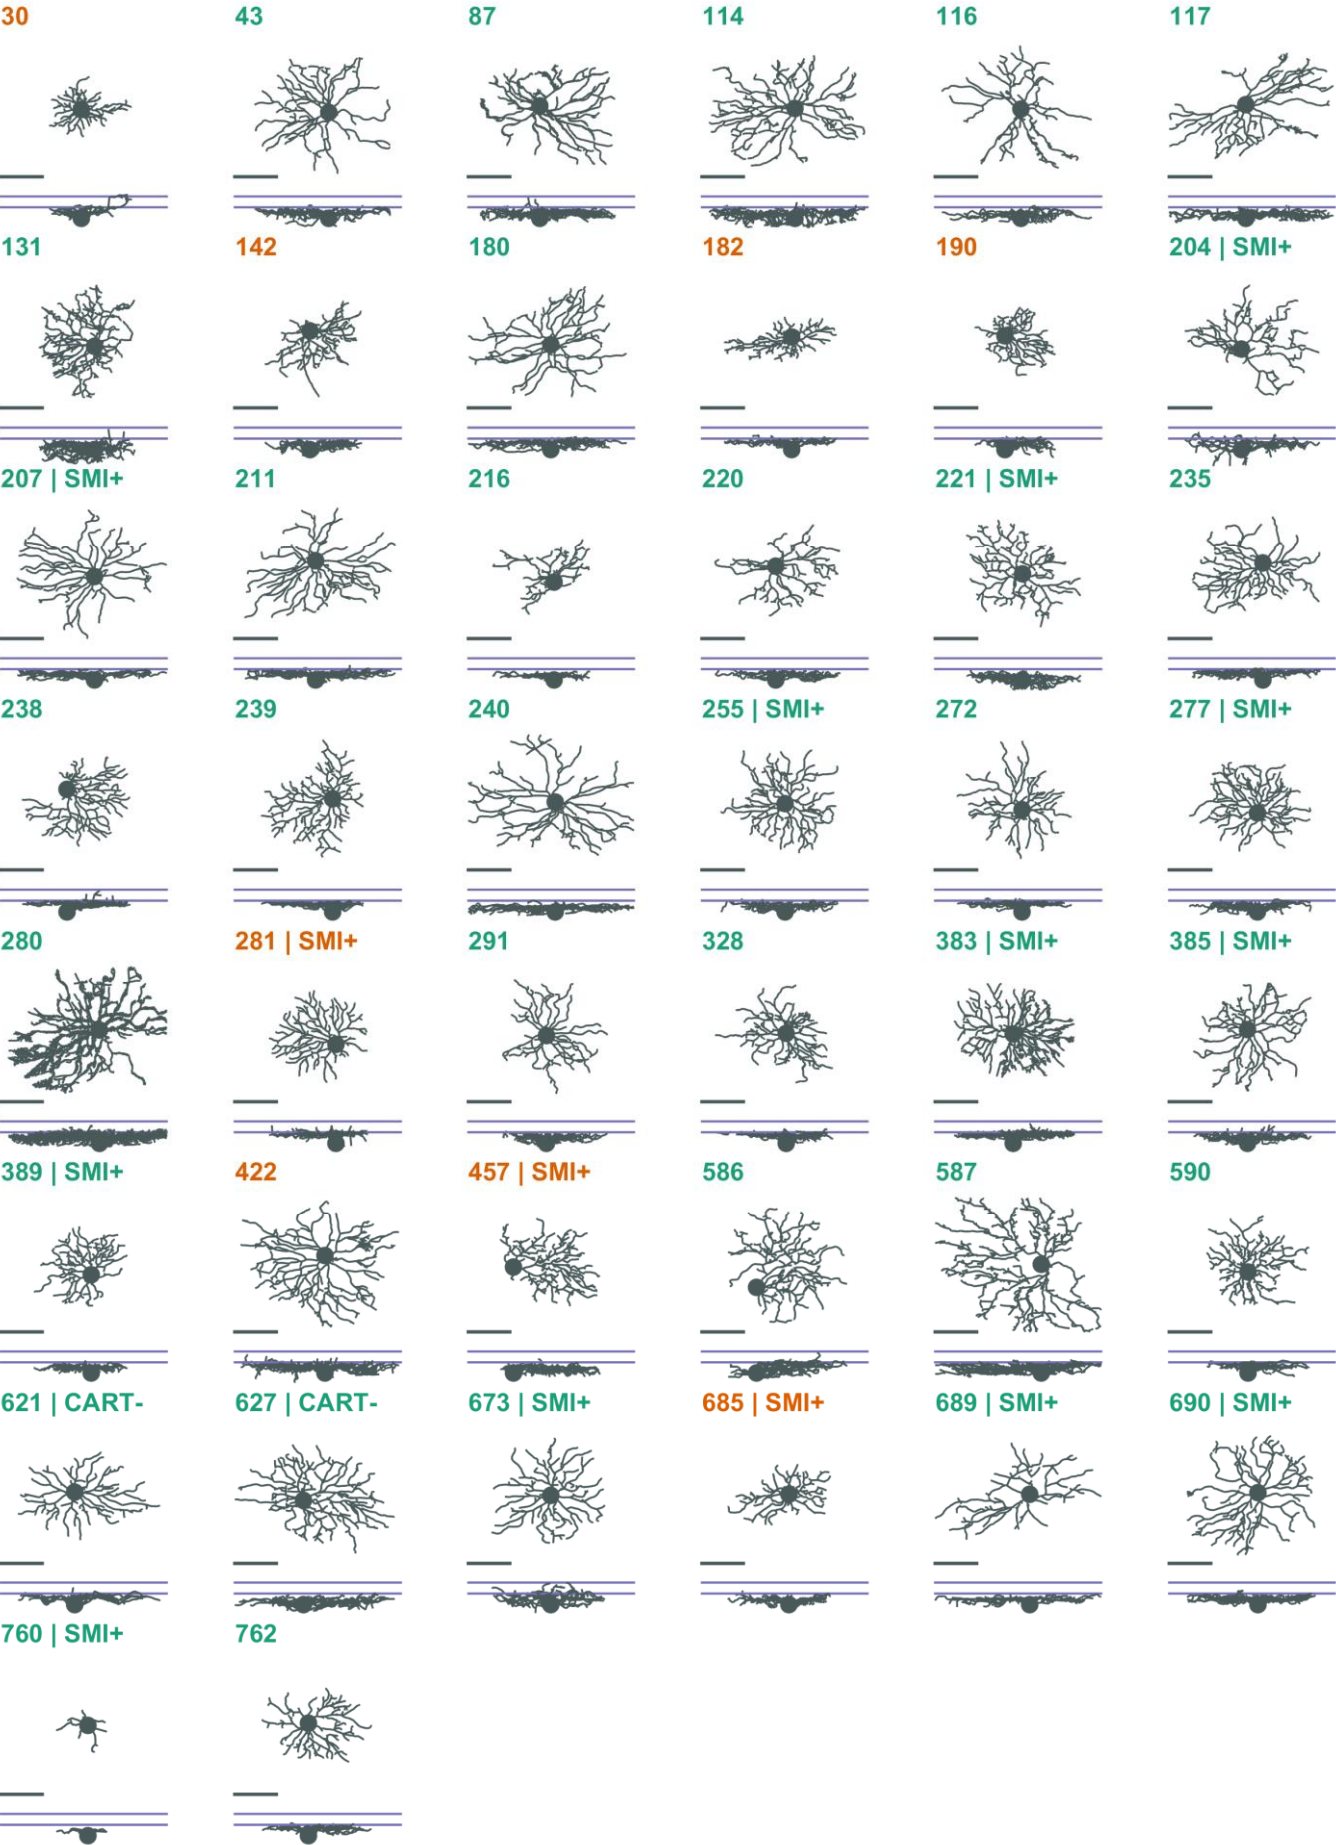

N Cluster 14 | 8n/9n

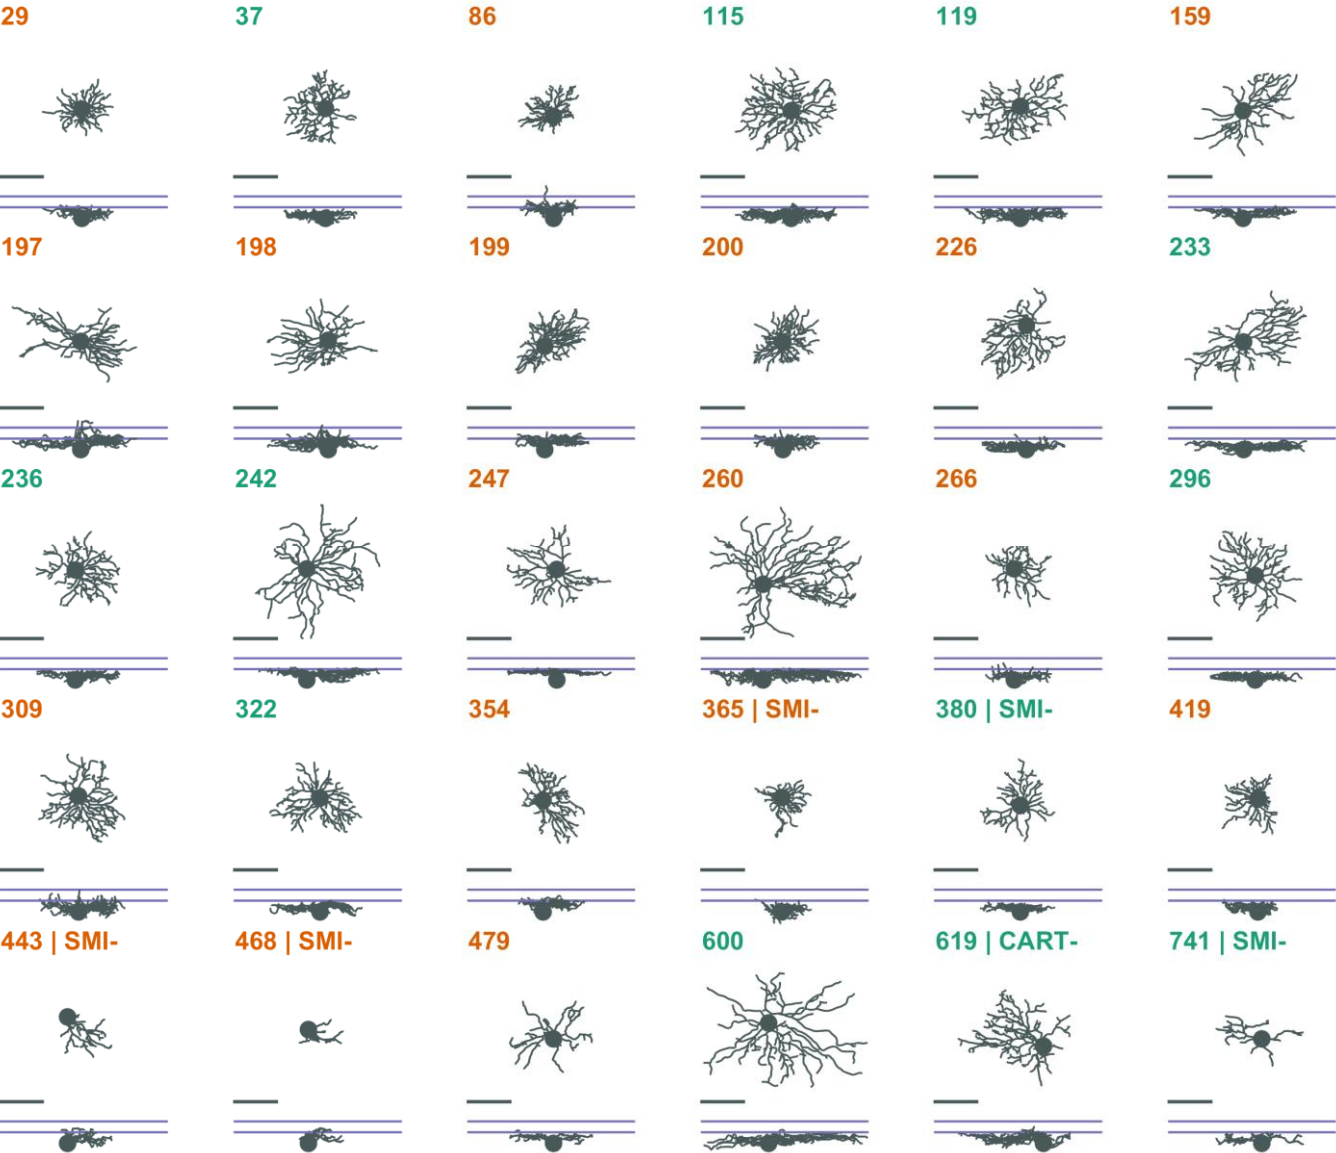



O Cluster -1 | 1ni | OFF Step

79

151

639

640

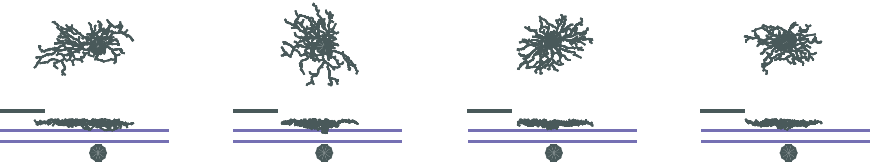

P Cluster -2 | 2o | G5b,c

337

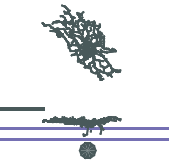

Q Cluster -3 | 25

428

472

554

736

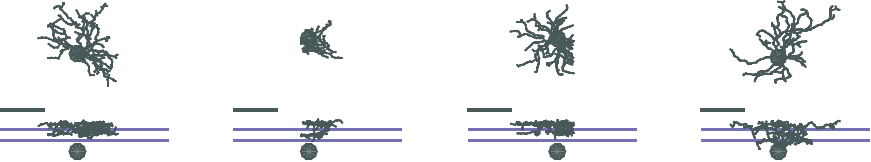

R Cluster -4 | 28

218

394

491

561

584

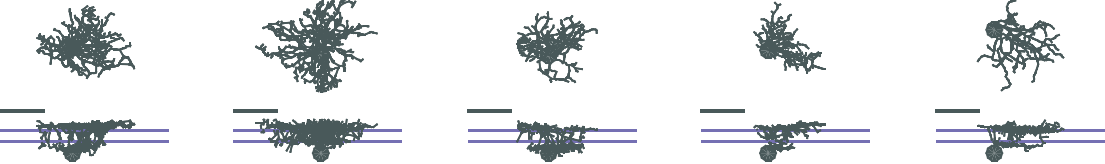

S Cluster -5 | 3i

167

363

703 | SMI-

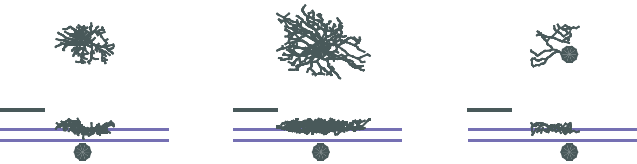

T Cluster -6 | 3o

269

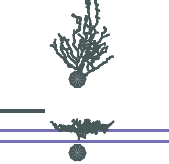

U Cluster -7 | 51 | LED / W3B

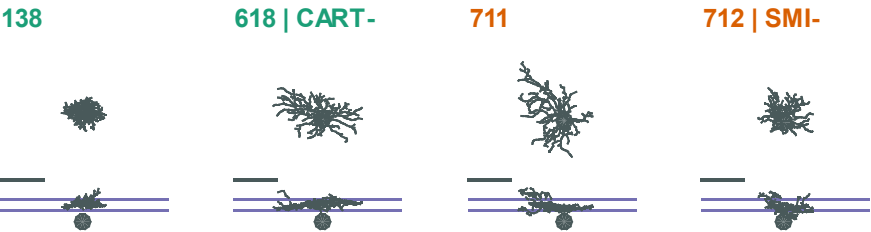

V Cluster -8 | 72

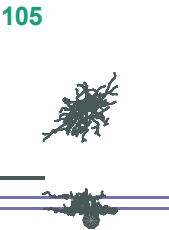

X Cluster -9 | 73 | OND

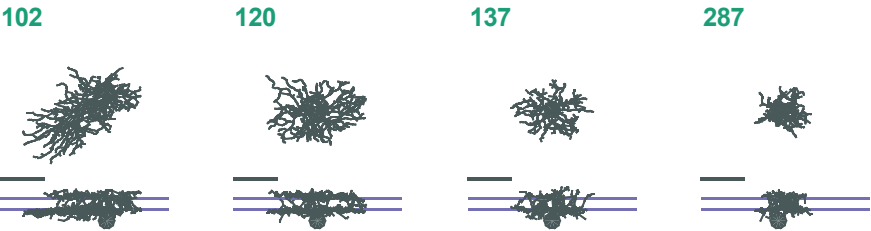

Y Cluster -10 | 81i

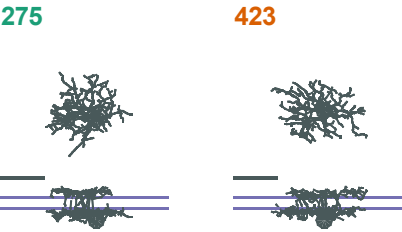

Z Cluster -11 | 82n

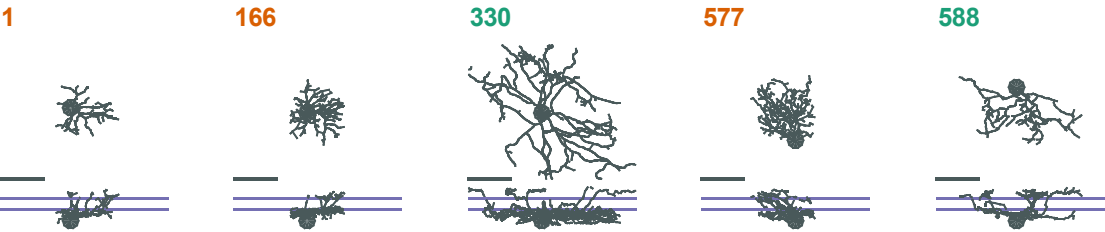

AA Cluster -12 | 82wi | vOS

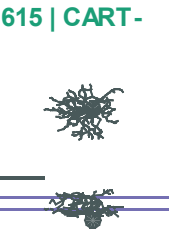

BB Cluster -13 | 85

536

593

670

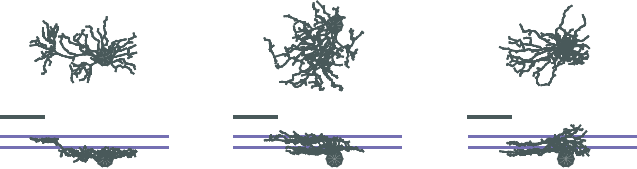

CC Cluster -14 | 9w | M2

633 | CART-

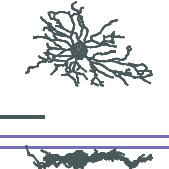

DD Cluster -15 | 91

214

409

692

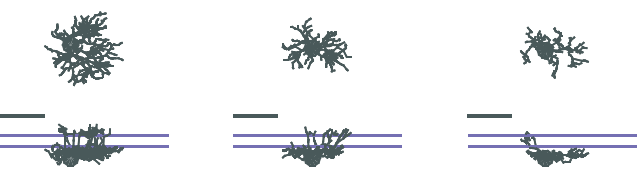

EE Cluster -16 | 915

433 | SMI-

465 | SMI-

745 | SMI-

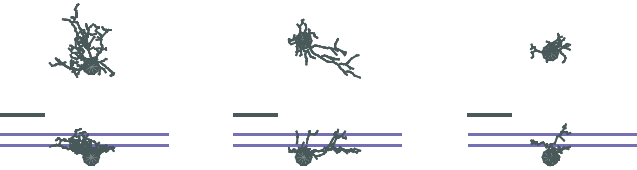

FF Cluster -17 | Fbistrat | F-bistratified

550

558

562

599

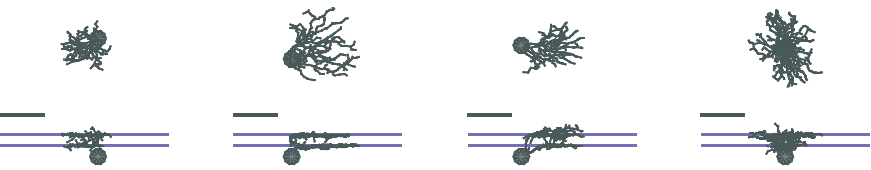

Supplement: fig2-data1 [file elife-50697-fig2-data1-v1.pdf]
